# Supplementary material for: Postoperative hormonal treatment for prevention of endometrioma recurrence after ovarian cystectomy: a systematic review and network meta‐analysis
Source: PubMed Central journal article supplement (PMC7754428; doi:10.1111/1471-0528.16366), 2020-07-14
Supplement: BJO-128-25-s001.pdf [file BJO-128-25-s001.pdf]

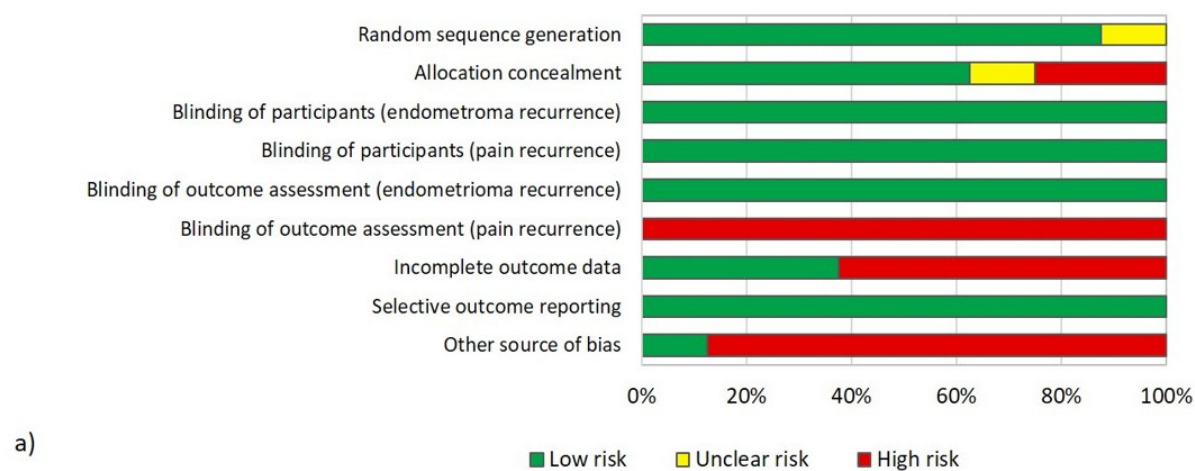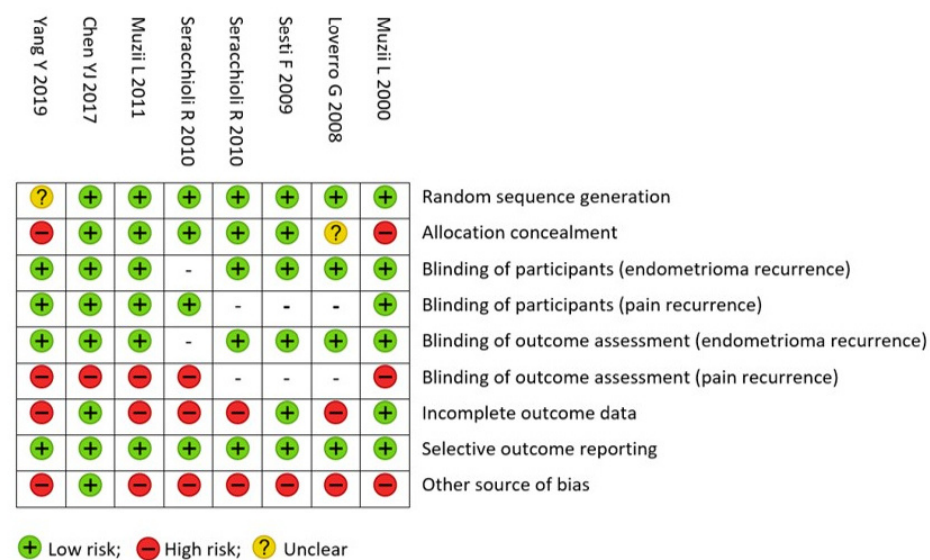

**Figure S1.** Risk of bias assessments for RCTs; a) Summary by domain b) Risk of bias for each included study and domain.

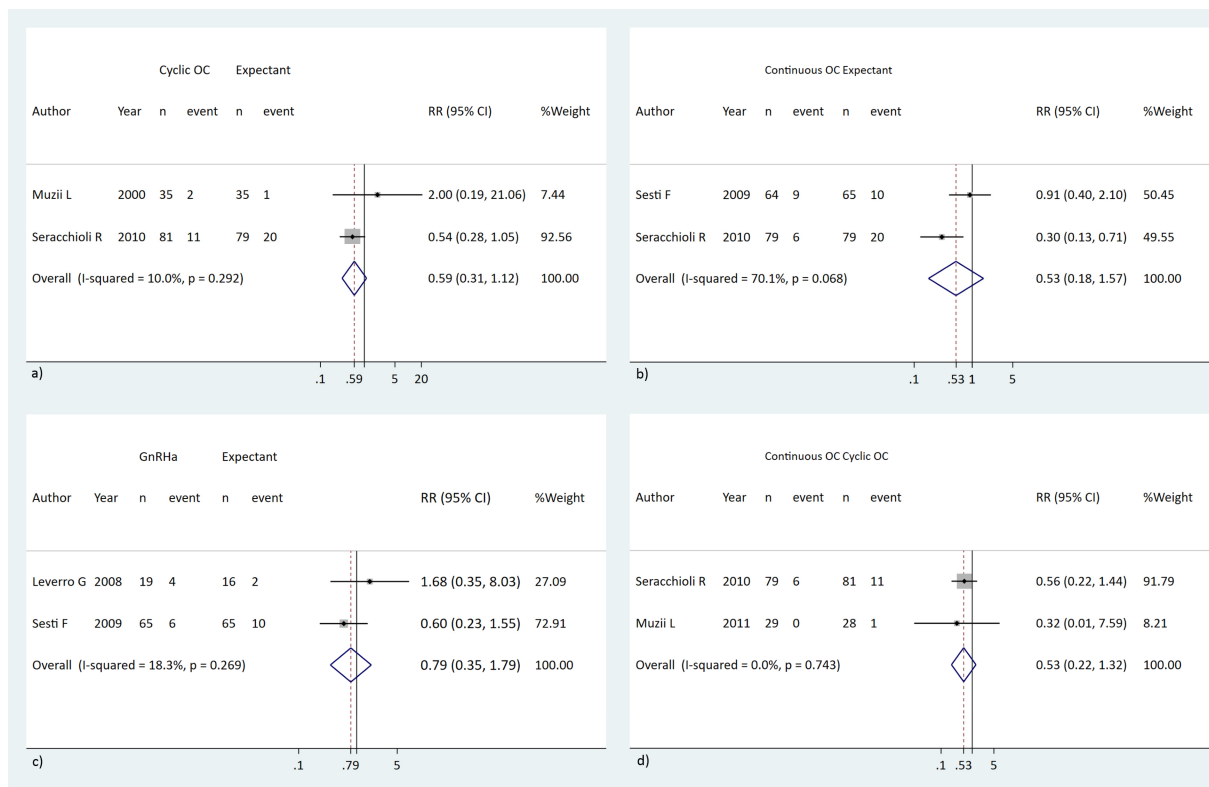

**Figure S2.** Forest plot of pairwise meta-analysis of endometrioma recurrence based on RCT network; a) Cyclic OC vs. expectant, b) Continuous OC vs. expectant, c) GnRHa vs. expectant, d) Continuous OC vs. cyclic OC.

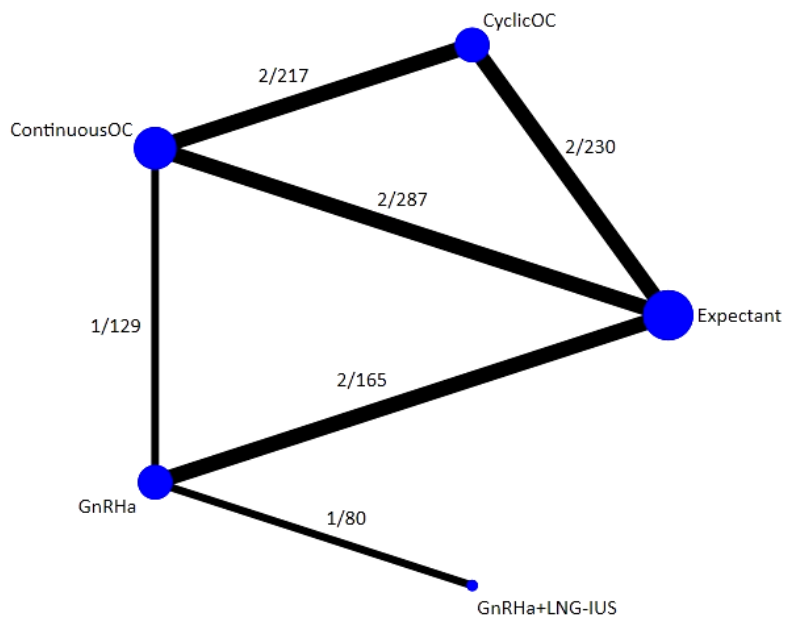

**Figure S3.** Network map of RCTs comparing among hormonal treatments for prevention of endometrioma recurrence; Numbers above edge are number of studies and included subjects in the corresponding comparison.

|                                 |                    | Direct comparisons in the network |      |      |      |      |       |
|---------------------------------|--------------------|-----------------------------------|------|------|------|------|-------|
|                                 |                    | AvsB                              | AvsC | AvsD | BvsC | CvsD | DvsE  |
| Network meta-analysis estimates | Mixed estimates    |                                   |      |      |      |      |       |
|                                 | AvsB               | 48.4                              | 13.0 | 8.5  | 21.6 | 8.5  | .     |
|                                 | AvsC               | 20.4                              | 25.7 | 16.8 | 20.4 | 16.8 | .     |
|                                 | AvsD               | 10.3                              | 13.1 | 42.9 | 10.3 | 23.4 | .     |
|                                 | BvsC               | 24.3                              | 14.7 | 9.6  | 41.8 | 9.6  | .     |
|                                 | CvsD               | 10.8                              | 13.7 | 24.6 | 10.8 | 40.0 | .     |
|                                 | DvsE               | .                                 | .    | .    | .    | .    | 100.0 |
|                                 | -----              |                                   |      |      |      |      |       |
|                                 | Indirect estimates |                                   |      |      |      |      |       |
|                                 | AvsE               | 6.2                               | 7.9  | 25.8 | 6.2  | 14.1 | 39.9  |
| BvsD                            | 26.7               | 0.5                               | 26.1 | 23.1 | 23.6 | .    |       |
| BvsE                            | 17.8               | 0.3                               | 17.5 | 15.4 | 15.8 | 33.2 |       |
| CvsE                            | 6.6                | 8.8                               | 14.9 | 6.6  | 24.3 | 39.2 |       |
| Entire network                  |                    | 16.6                              | 8.9  | 19.5 | 15.2 | 18.4 | 21.4  |
| Included studies                |                    | 2                                 | 2    | 2    | 2    | 1    | 1     |

**Figure S4.** Network contribution plot of RCTs for endometrioma recurrence outcome; Values are percentages; A, expectant; B, Cyclic OC; C, Continuous OC; D, GnRH $\alpha$ ; E, GnRH $\alpha$ +LNG-IUS.

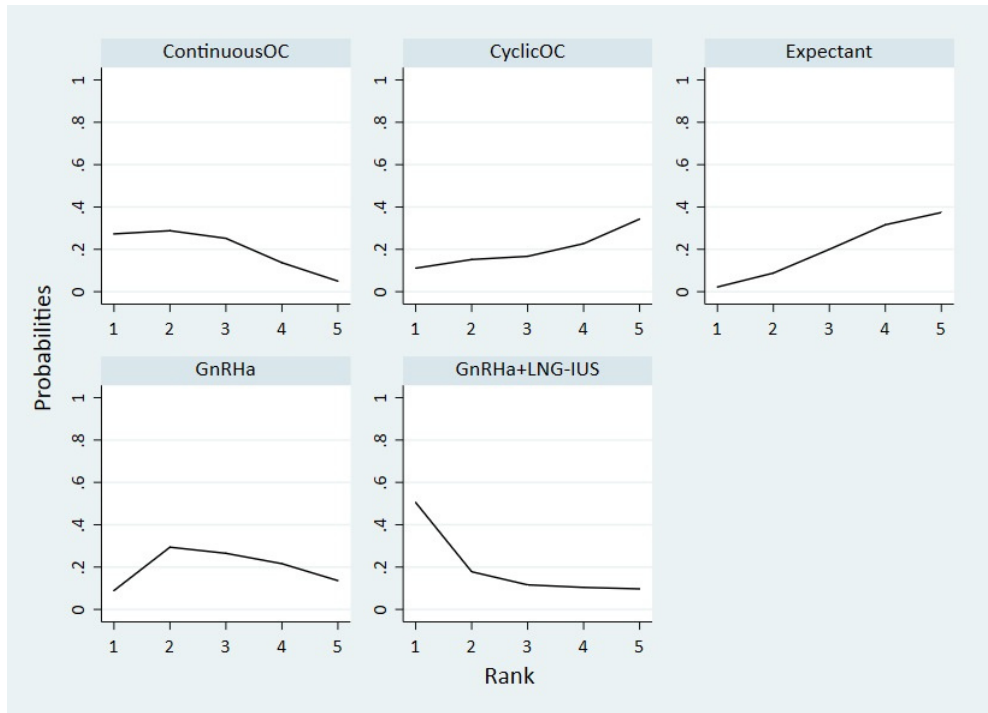

**Figure S5.** Rankograms for hormonal network of RCTs showing the probability for each regimen being at a particular order in lowering endometrioma recurrence.

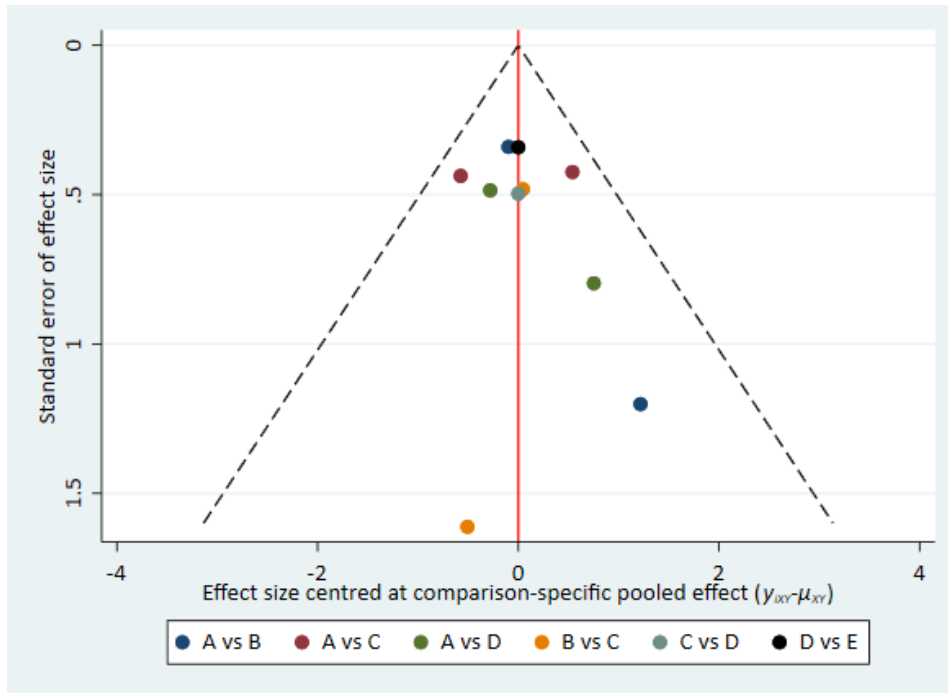

**Figure S6.** Comparison-adjusted funnel plot for network meta-analysis of RCTs on endometrioma recurrence outcome; A, expectant; B, Cyclic OC; C, Continuous OC; D, GnRH $\alpha$ ; E, GnRH $\alpha$ +LNG-IUS.

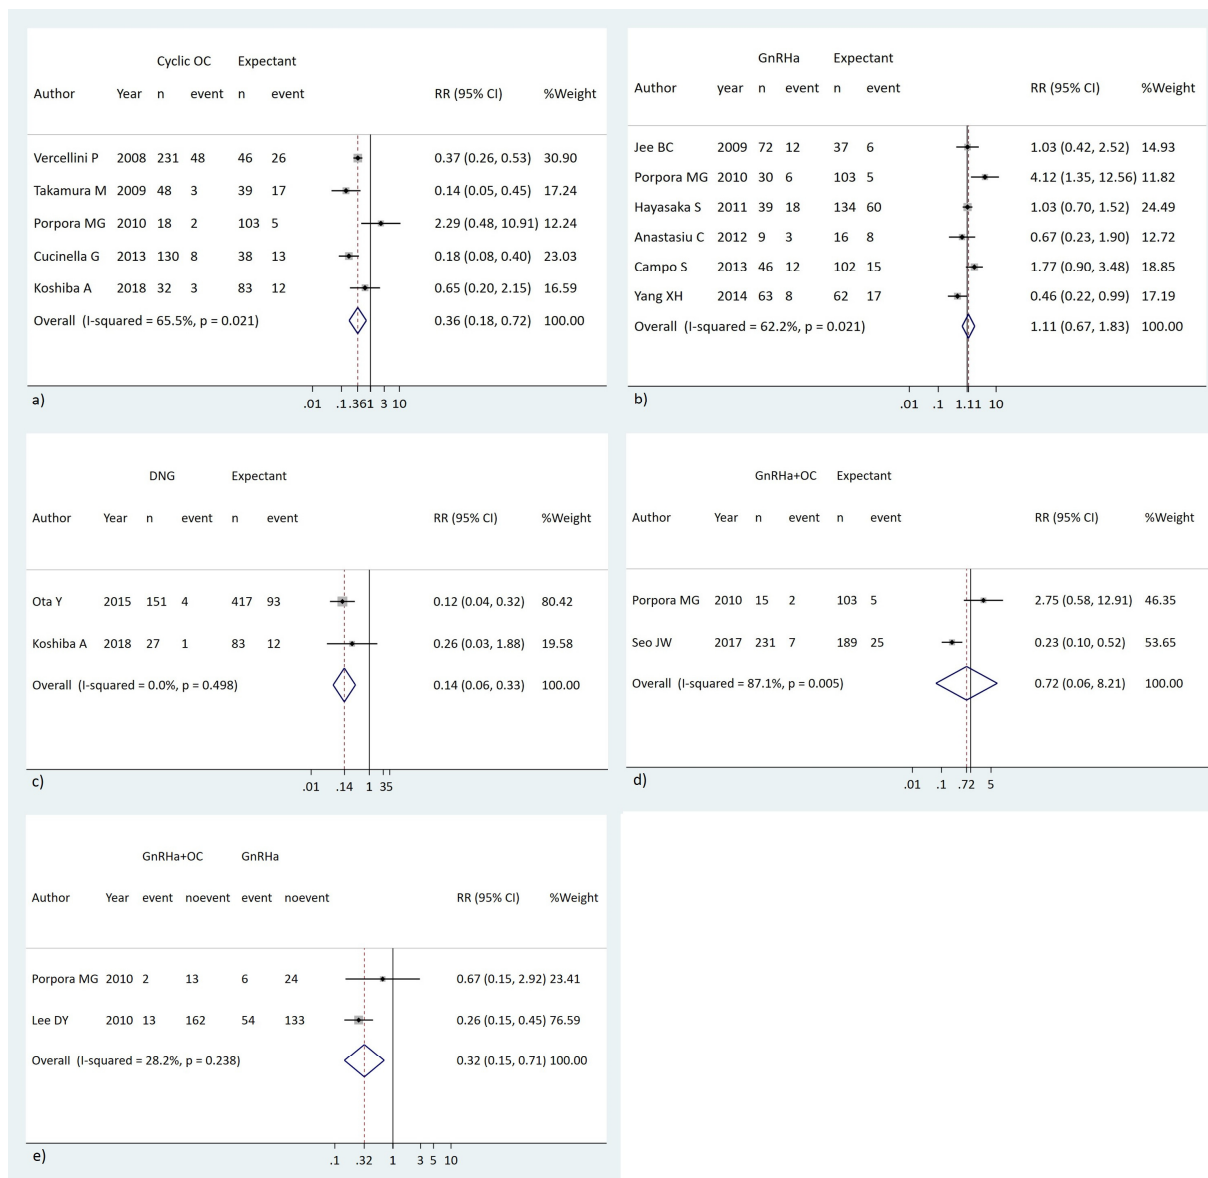

**Figure S7.** Forest plot of pairwise meta-analysis of endometrioma recurrence based on cohort network; a) Cyclic OC vs. expectant, b) GnRHa vs. expectant, c) DNG vs. expectant, d) GnRHa+OC vs. expectant, e) GnRHa+OC vs. GnRHa.

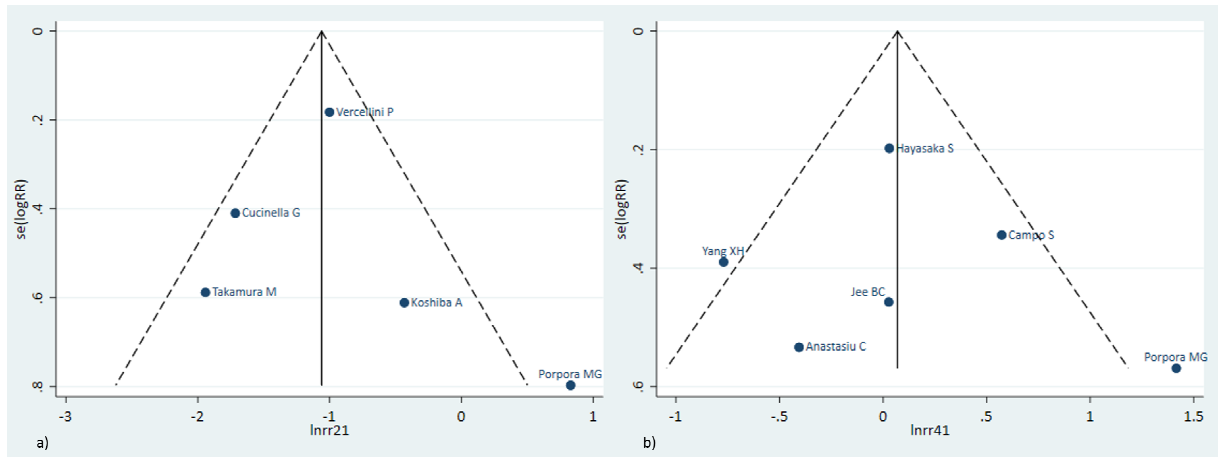

**Figure S8.** Funnel plot of cyclic OC vs. expectant (a); and GnRHa vs. expectant (b) for endometrioma recurrence based on cohort data.



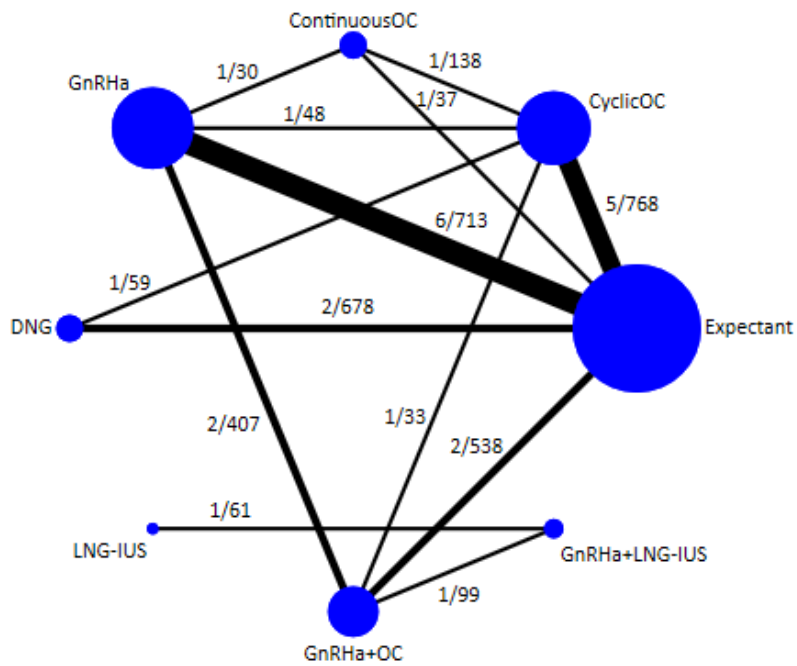

**Figure S9.** Network map of cohorts comparing among hormonal treatments for prevention of endometrioma recurrence; Numbers above edge are number of studies and included subjects in the corresponding comparison.

|                                 |                    | Direct comparisons in the network |      |      |      |      |      |      |      |      |      |      |       |      |
|---------------------------------|--------------------|-----------------------------------|------|------|------|------|------|------|------|------|------|------|-------|------|
|                                 |                    | AvsB                              | AvsC | AvsD | AvsE | AvsG | BvsC | BvsD | BvsE | BvsG | CvsD | DvsG | FvsH  | GvsH |
| Network meta-analysis estimates | Mixed estimates    |                                   |      |      |      |      |      |      |      |      |      |      |       |      |
|                                 | AvsB               | 67.2                              | 0.1  | 7.2  | 0.3  | 0.3  | 3.6  | 0.1  | 0.3  | -    | 7.5  | 0.3  | -     | 13.1 |
|                                 | AvsC               | 0.2                               | 51.6 | -    | 4.0  | 1.0  | 8.5  | 8.6  | 4.0  | 4.9  | 0.4  | 4.0  | -     | -    |
|                                 | AvsD               | 3.9                               | 4.5  | 64.0 | -    | 2.2  | 0.1  | 6.2  | 0.4  | 3.1  | 9.2  | 5.8  | -     | 0.8  |
|                                 | AvsE               | 0.5                               | 4.3  | 1.2  | 74.5 | 0.1  | 3.7  | 1.6  | 11.1 | 0.9  | 1.2  | 0.8  | -     | 0.1  |
|                                 | AvsG               | 2.1                               | 4.8  | 30.9 | 0.6  | 5.8  | 2.7  | 1.9  | 0.6  | 8.8  | 5.1  | 37.8 | -     | 0.4  |
|                                 | BvsC               | 5.4                               | 8.1  | 0.4  | 3.2  | 0.4  | 48.2 | 8.8  | 3.2  | 4.7  | 12.9 | 4.2  | -     | 1.0  |
|                                 | BvsD               | 0.2                               | 16.6 | 34.9 | 2.9  | 0.7  | 16.9 | 11.3 | 2.9  | 6.1  | 0.5  | 6.9  | -     | -    |
|                                 | BvsE               | 1.7                               | 15.2 | 4.4  | 39.5 | 0.5  | 13.2 | 5.7  | 9.2  | 3.3  | 4.2  | 2.8  | -     | 0.3  |
|                                 | BvsG               | -                                 | 11.7 | 7.5  | 2.0  | 4.0  | 11.7 | 7.6  | 2.0  | 10.4 | -    | 29.0 | -     | -    |
|                                 | CvsD               | 17.0                              | 0.6  | 38.8 | 1.6  | 1.5  | 19.7 | 0.4  | 1.6  | -    | 14.0 | -    | -     | 3.3  |
|                                 | DvsG               | 0.3                               | 3.1  | 11.9 | 0.6  | 6.0  | 3.5  | 2.8  | 0.6  | 9.5  | 0.8  | 61.0 | -     | 0.1  |
|                                 | FvsH               | -                                 | -    | -    | -    | -    | -    | -    | -    | -    | -    | -    | 100.0 | -    |
|                                 | GvsH               | 67.2                              | 0.1  | 7.2  | 0.3  | 0.3  | 3.6  | 0.1  | 0.3  | -    | 7.5  | 0.3  | -     | 13.1 |
|                                 | Indirect estimates |                                   |      |      |      |      |      |      |      |      |      |      |       |      |
|                                 | AvsF               | -                                 | 0.1  | 7.2  | 0.3  | 0.3  | 3.6  | 0.1  | 0.3  | -    | 7.5  | 0.3  | -     | 13.1 |
|                                 | AvsH               | -                                 | 0.1  | 7.2  | 0.3  | 0.3  | 3.6  | 0.1  | 0.3  | -    | 7.5  | 0.3  | -     | 13.1 |
|                                 | BvsF               | -                                 | 0.1  | 7.2  | 0.3  | 0.3  | 3.6  | 0.1  | 0.3  | -    | 7.5  | 0.3  | -     | 13.1 |
|                                 | BvsH               | 67.2                              | 0.1  | 7.2  | 0.3  | 0.3  | 3.6  | 0.1  | 0.3  | -    | 7.5  | 0.3  | -     | 13.1 |
|                                 | CvsE               | -                                 | 0.6  | 1.4  | 40.4 | 0.2  | 18.4 | 3.8  | 4.8  | 2.2  | 7.8  | 2.0  | -     | 3.1  |
| CvsF                            | 67.2               | 0.1                               | 7.2  | 0.3  | 0.3  | 3.6  | 0.1  | 0.3  | -    | 7.5  | 0.3  | -    | 13.1  |      |
| CvsG                            | 1.1                | 1.1                               | 20.4 | 1.3  | 3.9  | 15.0 | 1.1  | 1.3  | 4.6  | 9.0  | 28.4 | -    | 2.3   |      |
| CvsH                            | 67.2               | 0.1                               | 7.2  | 0.3  | 0.3  | 3.6  | 0.1  | 0.3  | -    | 7.5  | 0.3  | -    | 13.1  |      |
| DvsE                            | 0.1                | 0.1                               | 34.2 | 40.0 | 1.1  | 2.1  | 4.8  | 6.2  | 2.2  | 4.4  | 3.3  | -    | 0.4   |      |
| DvsF                            | 0.1                | 0.1                               | 7.2  | 0.3  | 0.3  | 3.6  | 0.1  | 0.3  | -    | 7.5  | 0.3  | -    | 13.1  |      |
| DvsH                            | 0.1                | 0.1                               | 7.2  | 0.3  | 0.3  | 3.6  | 0.1  | 0.3  | -    | 7.5  | 0.3  | -    | 13.1  |      |
| EvsF                            | 67.2               | 0.1                               | 7.2  | 0.3  | 0.3  | 3.6  | 0.1  | 0.3  | -    | 7.5  | 0.3  | -    | 13.1  |      |
| EvsG                            | 1.5                | 1.5                               | 20.8 | 30.5 | 3.6  | -    | 2.0  | 5.0  | 6.1  | 3.0  | 25.8 | -    | 0.2   |      |
| EvsH                            | 0.1                | 0.1                               | 7.2  | 0.3  | 0.3  | 3.6  | 0.1  | 0.3  | -    | 7.5  | 0.3  | -    | 13.1  |      |
| FvsG                            | 67.2               | 0.1                               | 7.2  | 0.3  | 0.3  | 3.6  | 0.1  | 0.3  | -    | 7.5  | 0.3  | -    | 13.1  |      |
| Entire network                  |                    | 27.0                              | 5.2  | 15.5 | 10.7 | 1.5  | 8.5  | 2.8  | 2.4  | 3.0  | 5.9  | 9.9  | 2.3   | 5.8  |
| Included studies                |                    | 5                                 | 1    | 6    | 2    | 2    | 1    | 1    | 1    | 1    | 1    | 2    | 1     | 1    |

**Figure S10.** Network contribution plot of cohorts for endometrioma recurrence outcome; Values are percentages; A, expectant; B, Cyclic OC; C, Continuous OC; D, GnRHa; E, DNG; F, LNG-IUS; G, GnRHa+OC; H, GnRHa+LNG-IUS.

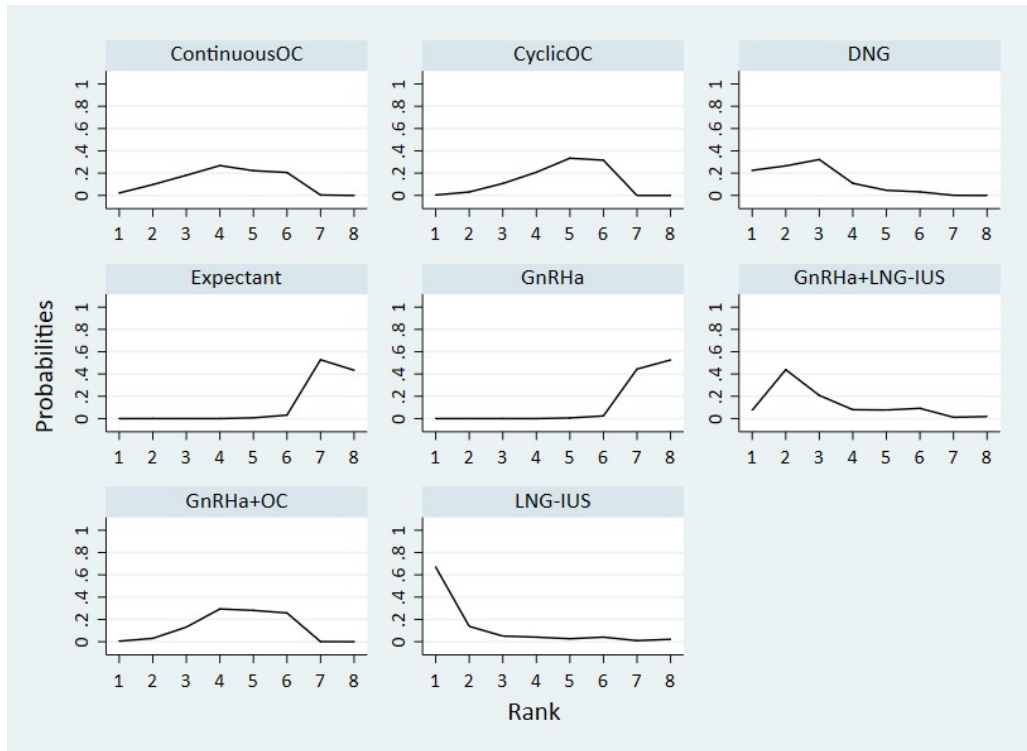

**Figure S11.** Rankograms for hormonal network of cohorts showing the probability for each regimen being at a particular order in lowering endometrioma recurrence.

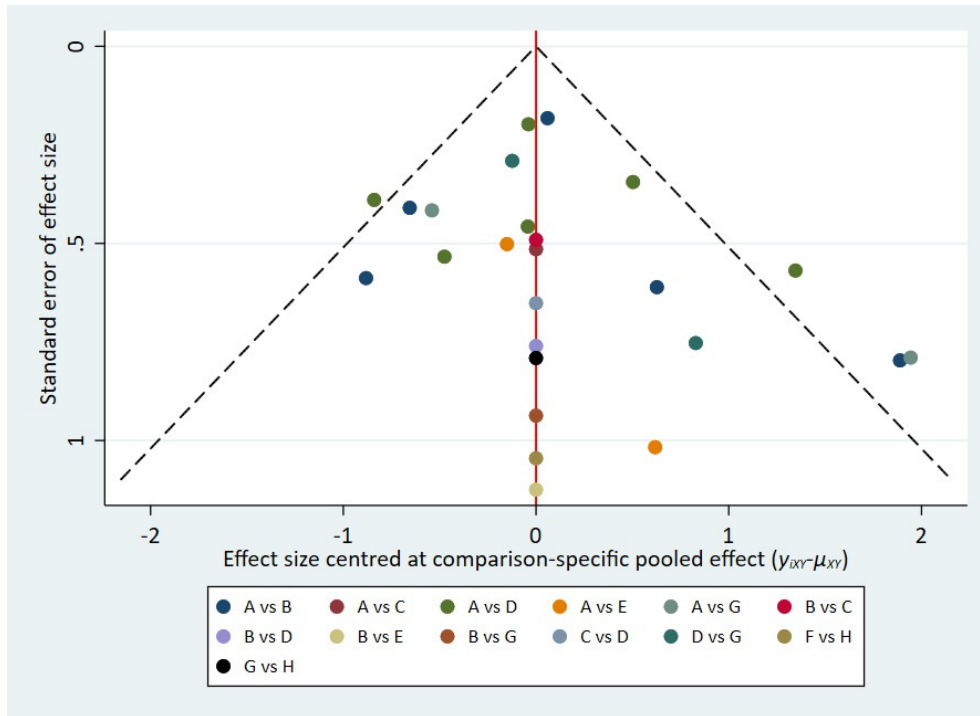

**Figure S12.** Comparison-adjusted funnel plot for the network meta-analysis of cohorts for endometrioma recurrence outcome; A, expectant; B, Cyclic OC; C, Continuous OC; D, GnRHa; E, DNG; F, LNG-US; G, GnRHa+OC; H, GnRHa+LNG-IUS.
